# Supplementary material for: Interaction of gases with monolayer WS2: an in situ spectroscopy study
Source: Royal Society of Chemistry journal article supplement (doi:10.1039/d1nr01483h), 2021-01-01
Supplement: d1nr01483h1.pdf [file d1nr01483h1.pdf]

## Supplementary Information

### Interaction of gases with monolayer $WS_2$ : An In Situ Spectroscopy Study

Rahul Rao<sup>1</sup>, Hyunil Kim<sup>1</sup>, Nestor Perea-López<sup>2</sup>, Mauricio Terrones<sup>2,3,4</sup>, Benji Maruyama<sup>1</sup>

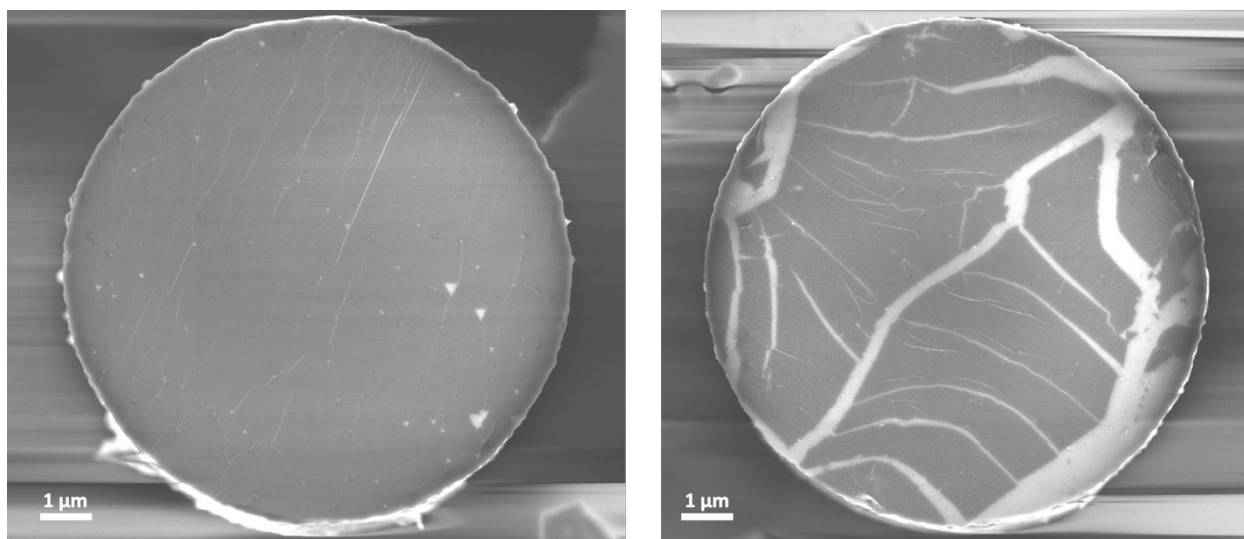

Fig. S1. SEM images of monolayer CVD-grown monolayer  $WS_2$  transferred onto the ARES micropillars. Examples are shown of fully and partially coated micropillars, to highlight the contrast between the  $WS_2$  and the silicon.

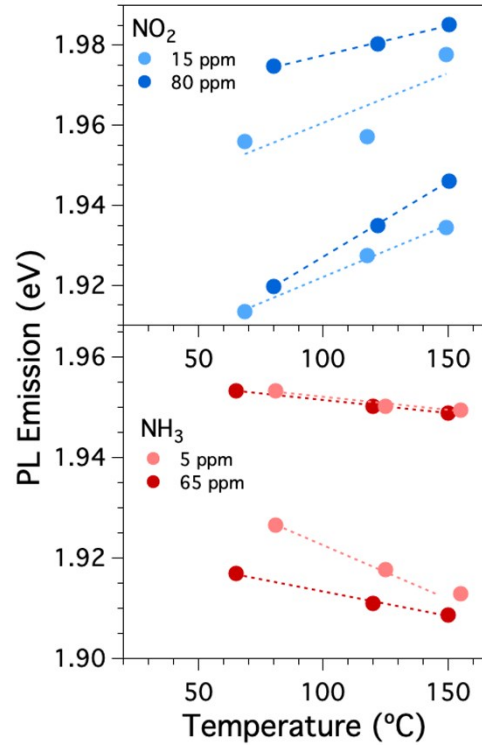

Fig. S2. Exciton and trion emission energies as a function of temperature for exposure of monolayer WS<sub>2</sub> to NO<sub>2</sub> (top panel) and NH<sub>3</sub> (bottom panel).

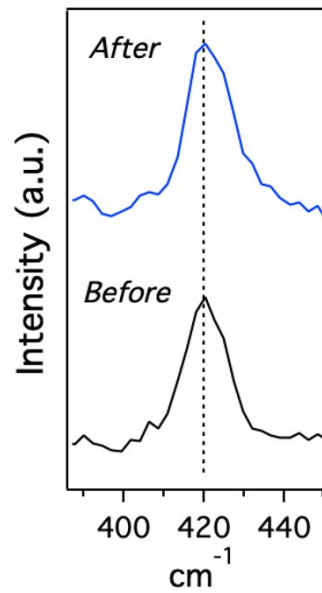

Fig. S3. Raman spectrum in the A<sub>1g</sub> peak region, collected before and after exposure to 80 ppm NO<sub>2</sub> at 120 °C.
